# Supplementary material
Source: PubMed Central journal article supplement (PMC208783)

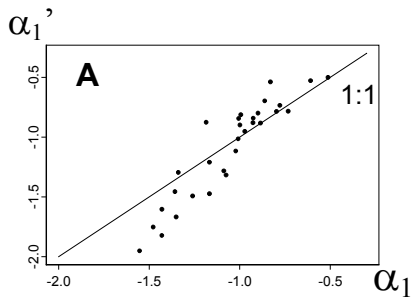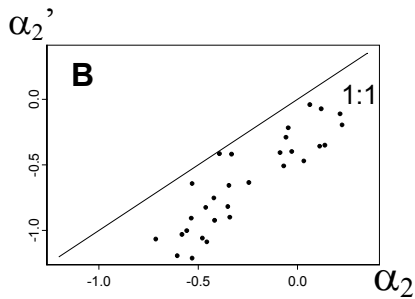

Supplement: pnas_100_20_11478__7.pdf [file pnas_100_20_11478__7.pdf]
